# Supplementary material for: Germ Cell–Specific Proteins AKAP4 and ASPX Facilitate Identification of Rare Spermatozoa in Non-Obstructive Azoospermia
Source: PubMed Central journal article supplement — Mol Cell Proteomics. 2023 Apr 21;22(6):100556. doi: 10.1016/j.mcpro.2023.100556 (PMC10209038; doi:10.1016/j.mcpro.2023.100556), 2023-04-21
Supplement: mmc1.pdf [file mmc1.pdf]

## Supplemental Figures

### **Germ cell-specific proteins AKAP4 and ASPX facilitate identification of rare spermatozoa in non-obstructive azoospermia**

Junyan Zhang, Mirzo Kanoatov, Keith Jarvi, Andree Gauthier-Fisher, Sergey I. Moskovtsev,  
Clifford Librach and Andrei P. Drabovich\*

\*Corresponding author. E-mail: andrei.drabovich@ualberta.ca

#### **List of Supplemental Figures**

Fig. S1. Determination of a limit of detection of SRM assay for ASPX\_HUMAN protein in SP.

Fig. S2. SRM analysis of the matched pre-vasectomy (N=18) and post-vasectomy (N=18) SP to assess testis/epididymis specificity of candidate proteins.

Fig. S3. SRM quantification of candidate proteins in SP of pre-vasectomy, post-vasectomy and NOA patients.

Fig. S4. SRM quantification of candidate proteins in SP of NOA patients with the known mTESE outcomes.

Fig. S5. Localization of ADA20\_HUMAN and ADA29\_HUMAN proteins in motile spermatozoa.

Fig. S6. Imaging flow cytometry identification and visualization of the morphologically normal and intact AKAP4<sup>+</sup>/ASPX<sup>+</sup>/Hoechst<sup>+</sup> spermatozoa in semen pellet of a normozoospermic patient.

Fig. S7. Imaging flow cytometry identification and visualization of intact AKAP4<sup>+</sup>/ASPX<sup>+</sup>/Hoechst<sup>+</sup> spermatozoa in semen pellet of a patient diagnosed with oligospermia.

Fig. S8. Visualization of two intact AKAP4<sup>+</sup>/ASPX<sup>+</sup>/Hoechst<sup>+</sup> spermatozoa in NOA semen pellet.

**Figure S1**

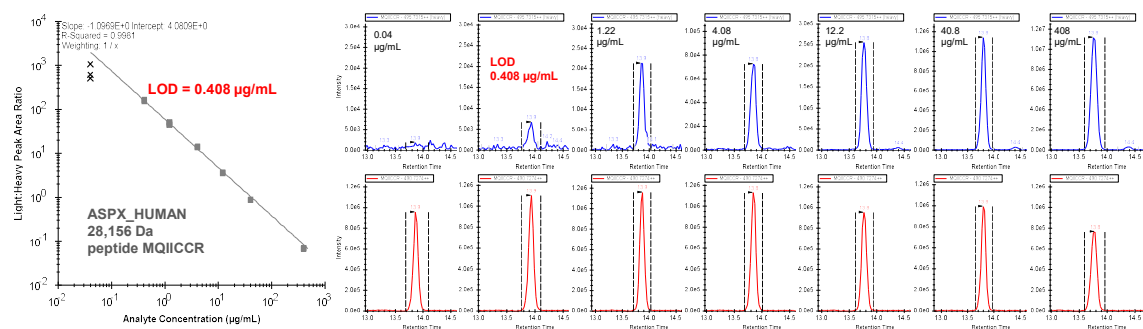

**Fig. S1. Determination of a limit of detection of SRM assay for ASPX\_HUMAN protein in SP.** Serial dilutions of a heavy peptide MQIICCR were spiked into a digest of a pre-vasectomy SP sample with the high and constant levels of the endogenous “light peptide” MQIICCR.

(Left panel) The limit of detection (LOD=0.408 µg/mL) was calculated using the SP volume (accounted for dilutions), the UniProt molecular mass of ASPX\_HUMAN (28,156 Da), and the lowest amount (moles) of MQIICCR detectable with the signal-to-noise ratio  $\geq 3$  and light-to-heavy ratio within the linear range. Three technical replicates were measured for each dilution.

(Right panel) Peaks correspond to the heavy and light peptides in one of the technical replicates.

Figure S2

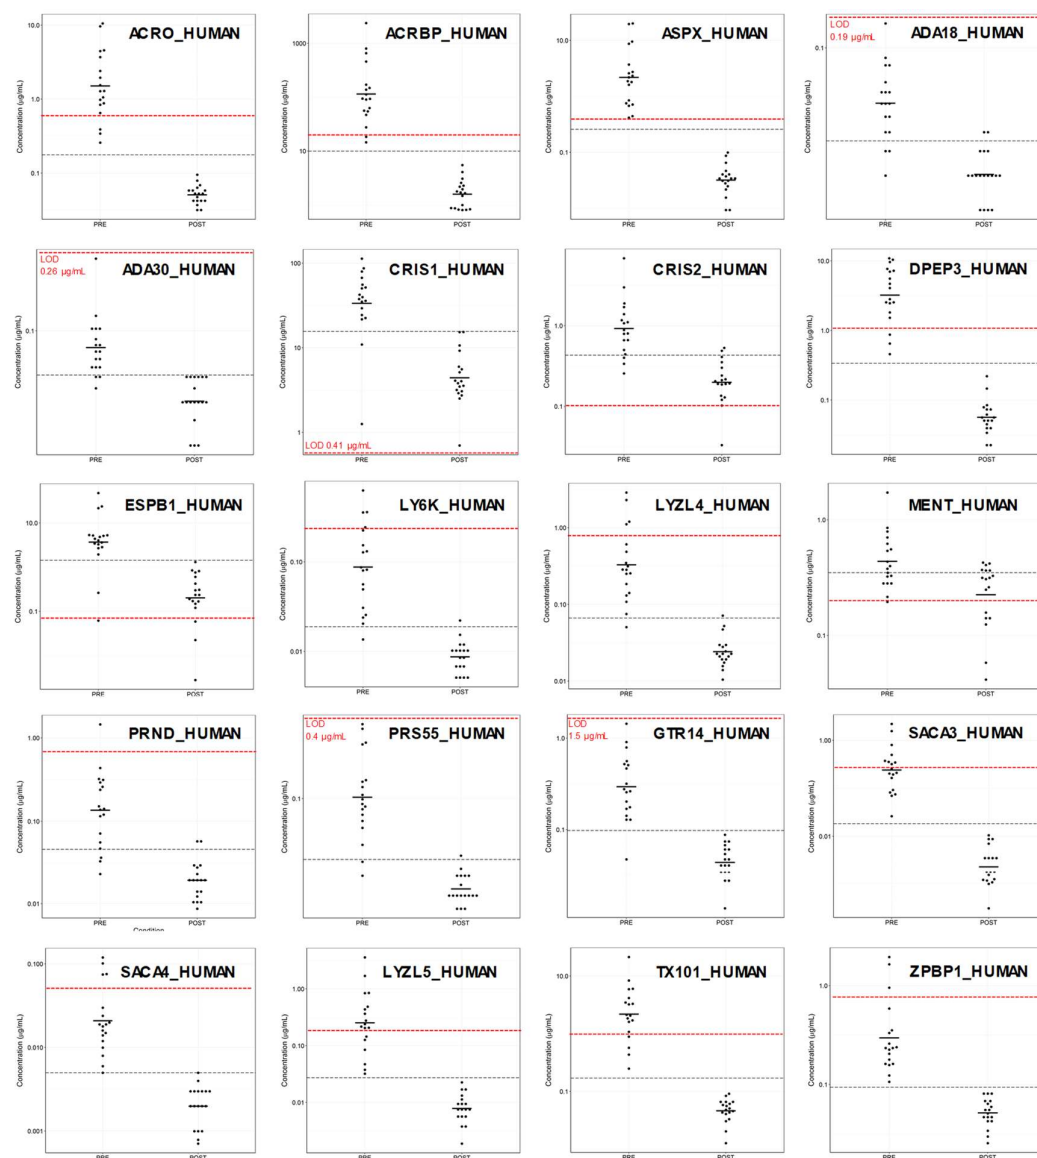

**Fig. S2. SRM analysis of the matched pre-vasectomy (N=18) and post-vasectomy (N=18) SP to access testis/epididymis specificity of candidate proteins.** Grey dashed lines represent apparent cutoffs for the unadjusted raw levels calculated using SRM L/H ratios, while red dashed lines represent SRM assay LODs. In post-vasectomy SP, levels of testis- and epididymis-specific proteins decreased below LODs. Proteins with the residual expression in the prostate or seminal vesicles would still be detectable in some post-vasectomy SP samples (for example, CRIS2\_HUMAN and MENT\_HUMAN proteins). ASPX\_HUMAN at its limit of detection (0.4 ug/mL) revealed ultimate specificity and sensitivity (100%) to detect post-vasectomy.

Figure S3

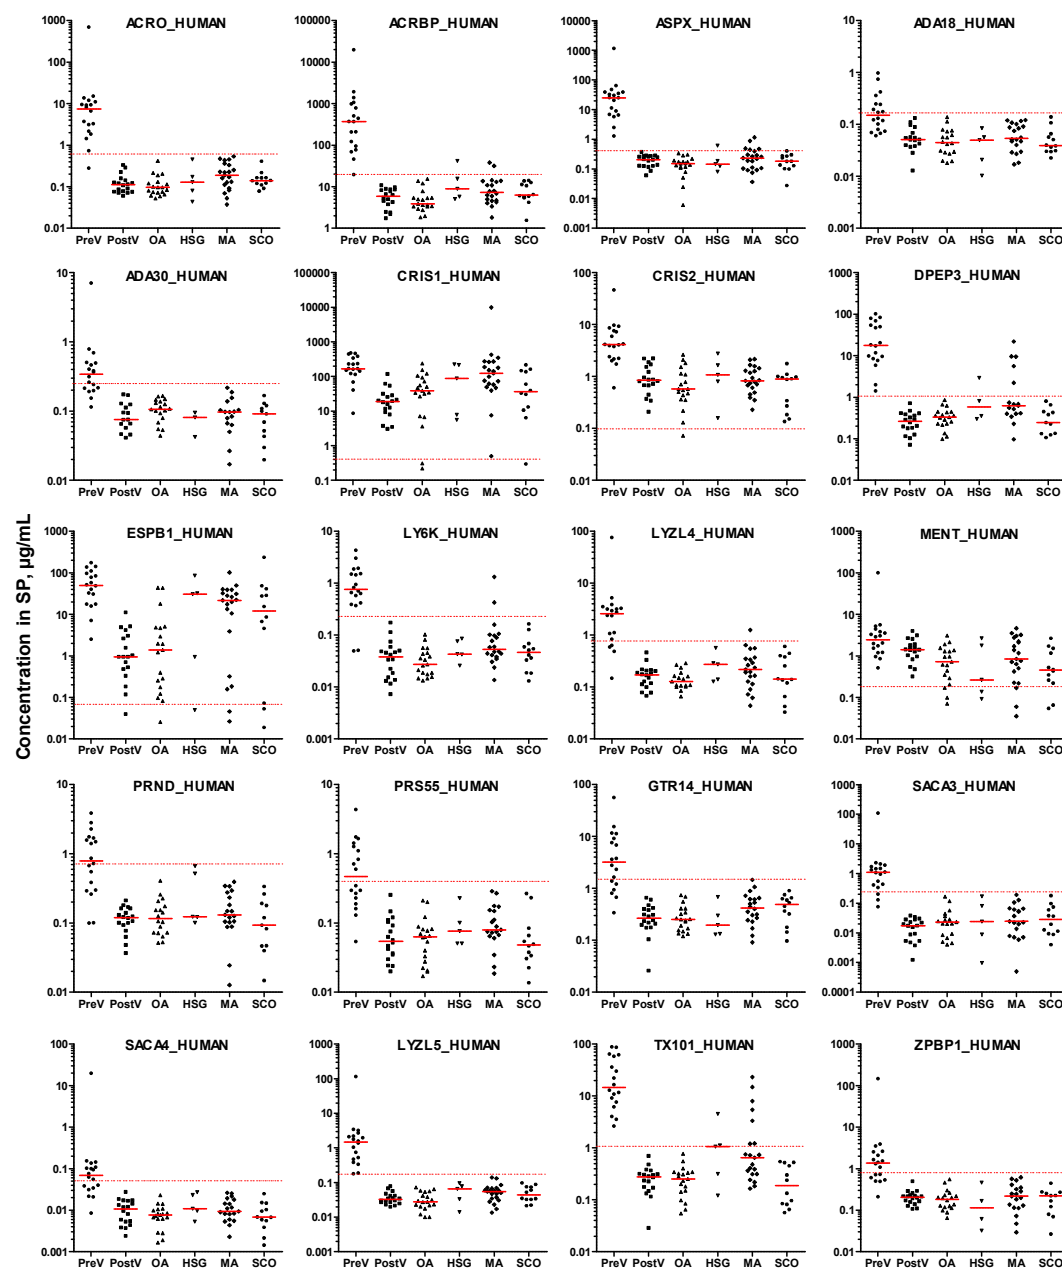

**Fig. S3. SRM quantification of candidate proteins in SP of pre-vasectomy, post-vasectomy, and NOA patients.** Testis-specific proteins and two epididymal proteins CRIS1\_HUMAN and ESPB1\_HUMAN were measured in the independent set of unmatched pre-vasectomy (PreV; N=18) and post-vasectomy (PostV; N=18) SP, as well as SP of OA patients (N=19) and NOA patients with the histological subtypes of hypospermatogenesis (HGS; N=5), maturation arrest (MA; N=21) and Sertoli cell-only (SCO; N=12). Dashed lines represent SRM assay limits of detection.

Figure S4

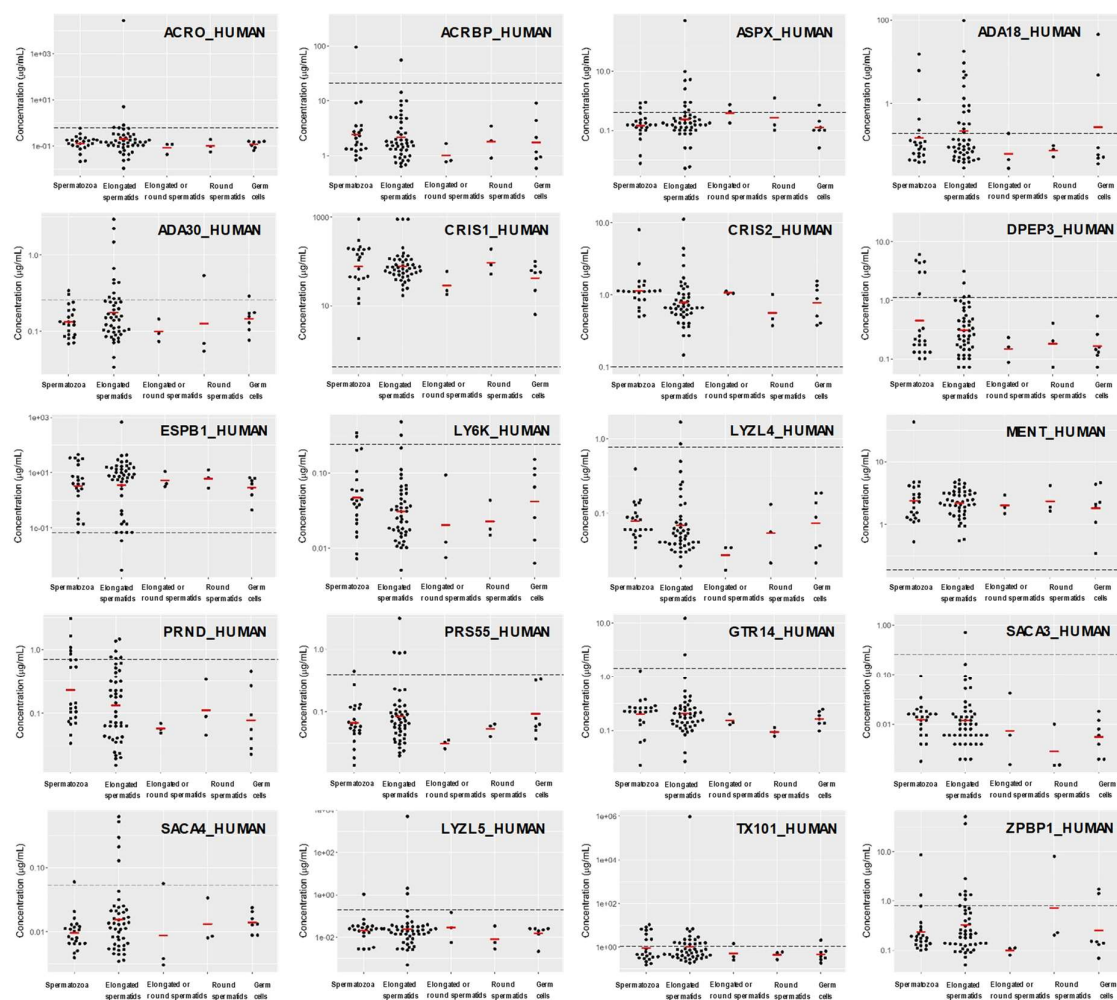

**Fig. S4. SRM quantification of candidate proteins in SP of NOA patients with the known mTESE outcomes.** Testis-specific proteins and two epididymal proteins CRIS1\_HUMAN and ESPB1\_HUMAN were measured in 84 serial SP samples of 27 NOA patients (obtained at baseline and at 1-3 months, before mTESE). The following cells types were retrieved with mTESE: spermatozoa (N=25 SP samples), elongated spermatids (N=46), elongated+round spermatids (N=3), round spermatids only (N=3), and immature germ cells (N=7). Dashed lines represent SRM assay limits of detection.

**Figure S5**

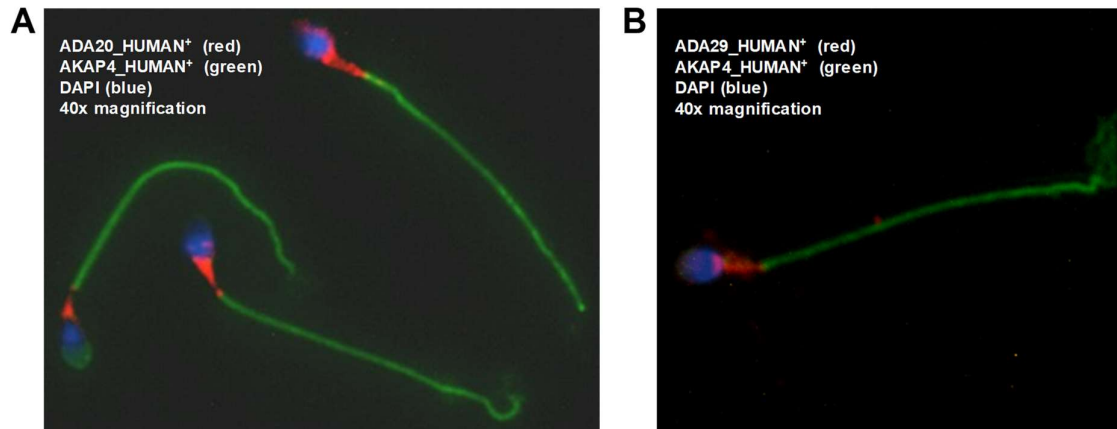

**Fig. S5. Localization of ADA20\_HUMAN and ADA29\_HUMAN proteins in motile spermatozoa.** Immunofluorescent microscopy analysis of ADA20\_HUMAN (ADAM20 gene; red) (**A**) and ADA29\_HUMAN (ADAM29 gene; red) (**B**) revealed their expression in the post-acrosomal region of spermatozoa, similar to the testis-specific proteins TX101\_HUMAN, DPEP3\_HUMAN and LY6K\_HUMAN, as we previously reported in Schiza et al. *Mol Cell Proteomics* 2019, 18, 338-351 and *Mol Cell Proteomics* 2018, 17, 2480-2495. The tail and nucleus were stained with AKAP4\_HUMAN (green) and DAPI (blue).

**Figure S6**

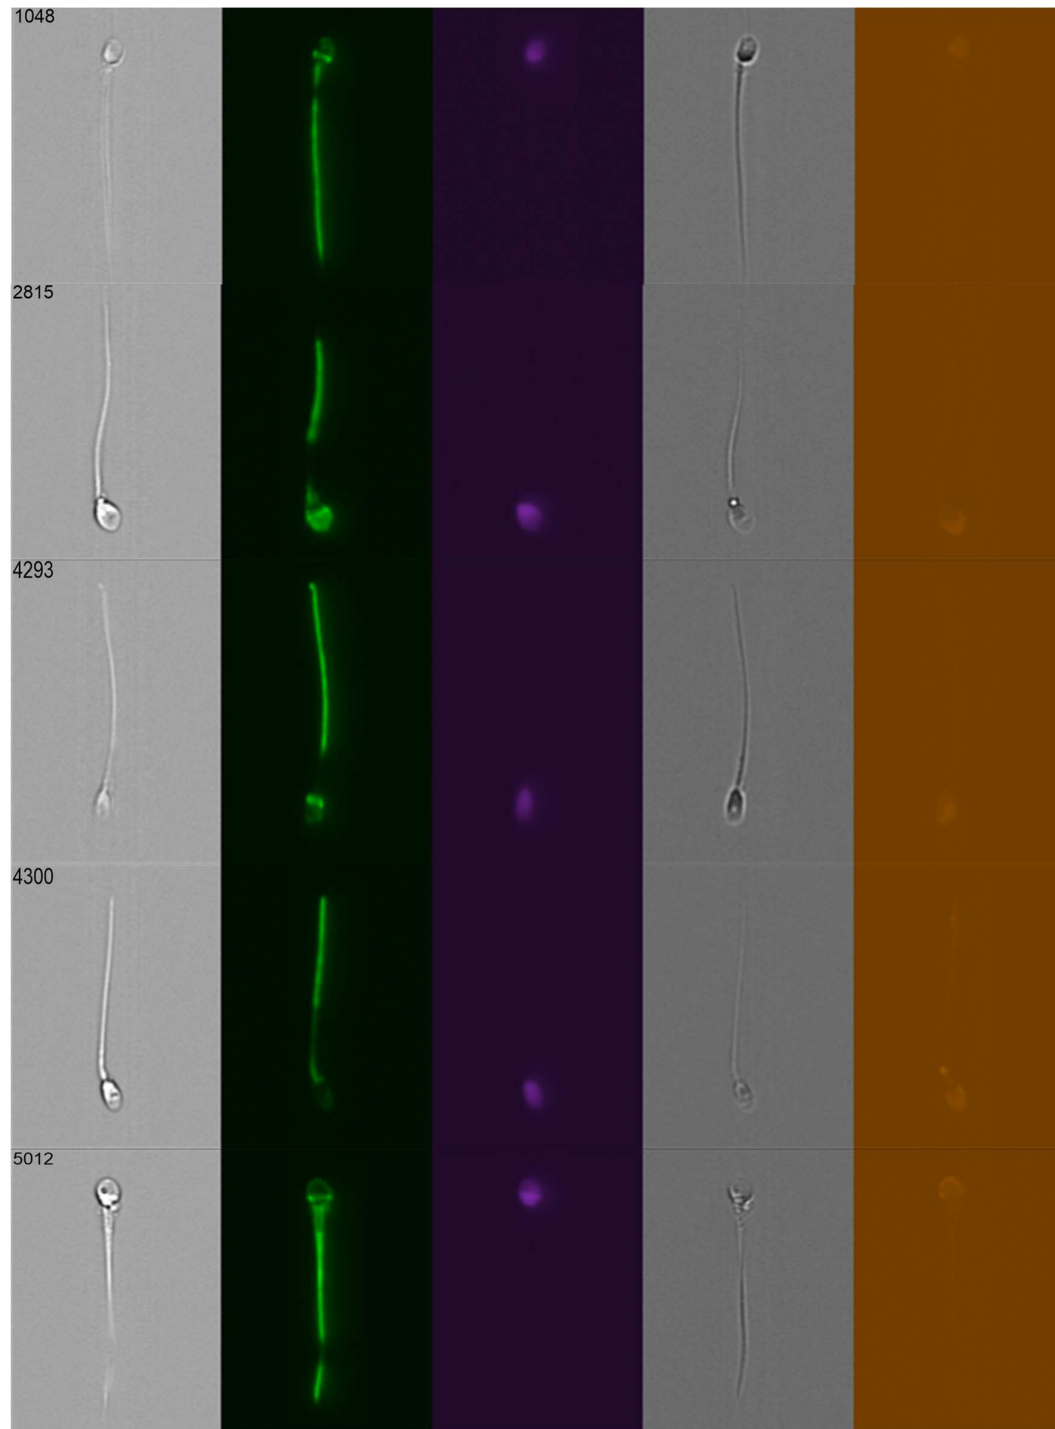

**Fig. S6. Imaging flow cytometry identification and visualization of the morphologically normal and intact AKAP4<sup>+</sup>/ASPX<sup>+</sup>/Hoechst<sup>+</sup> spermatozoa in semen pellet of a normozoospermic patient.**

**Figure S7**

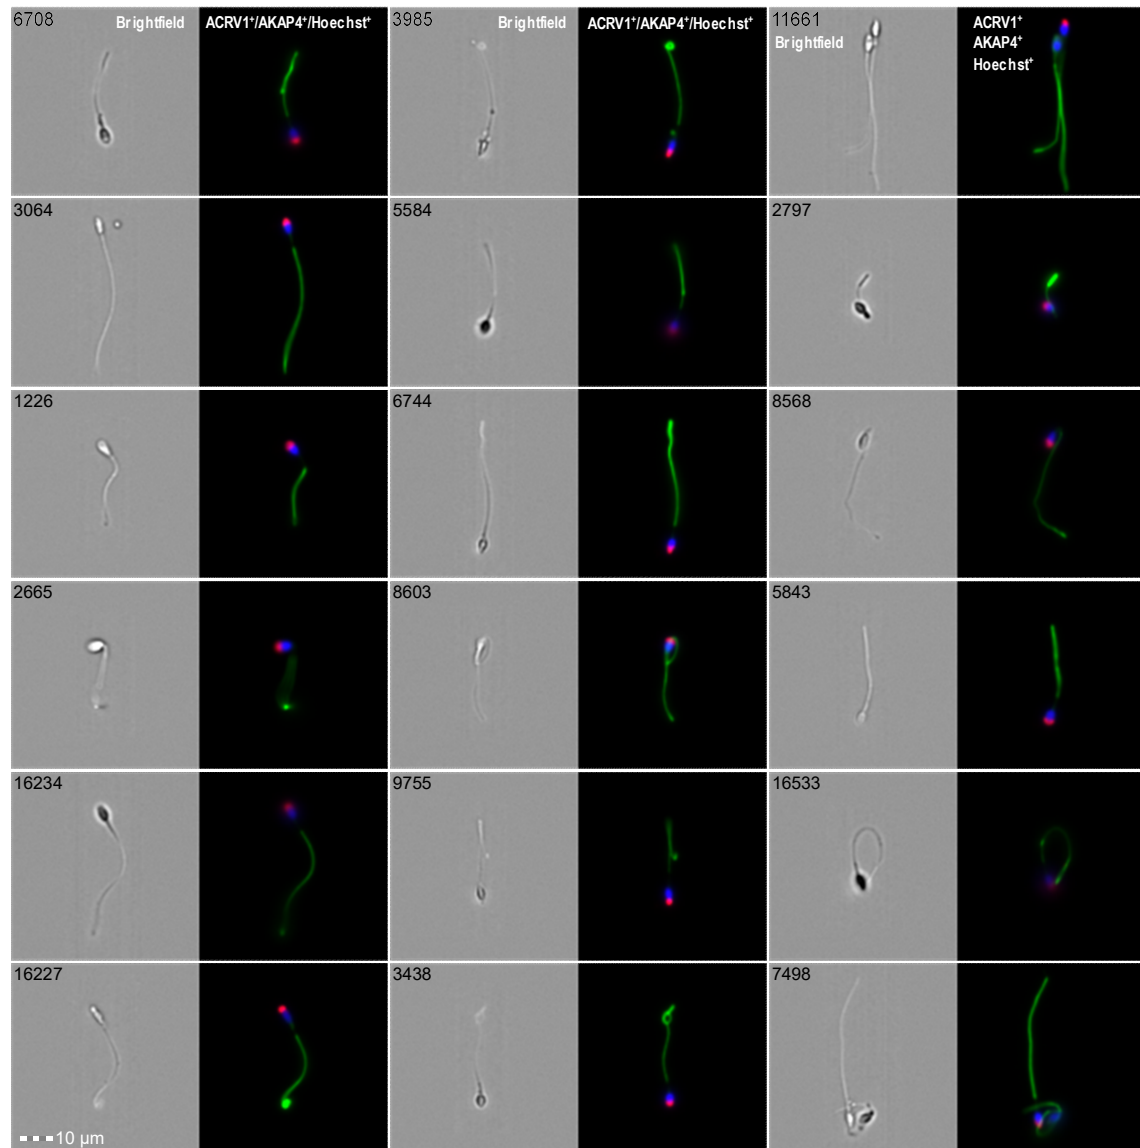

**Fig. S7. Imaging flow cytometry identification and visualization of intact AKAP4<sup>+</sup>/ASPX<sup>+</sup>/Hoechst<sup>+</sup> spermatozoa in semen pellet of a patient diagnosed with oligospermia.**



**Figure S8**

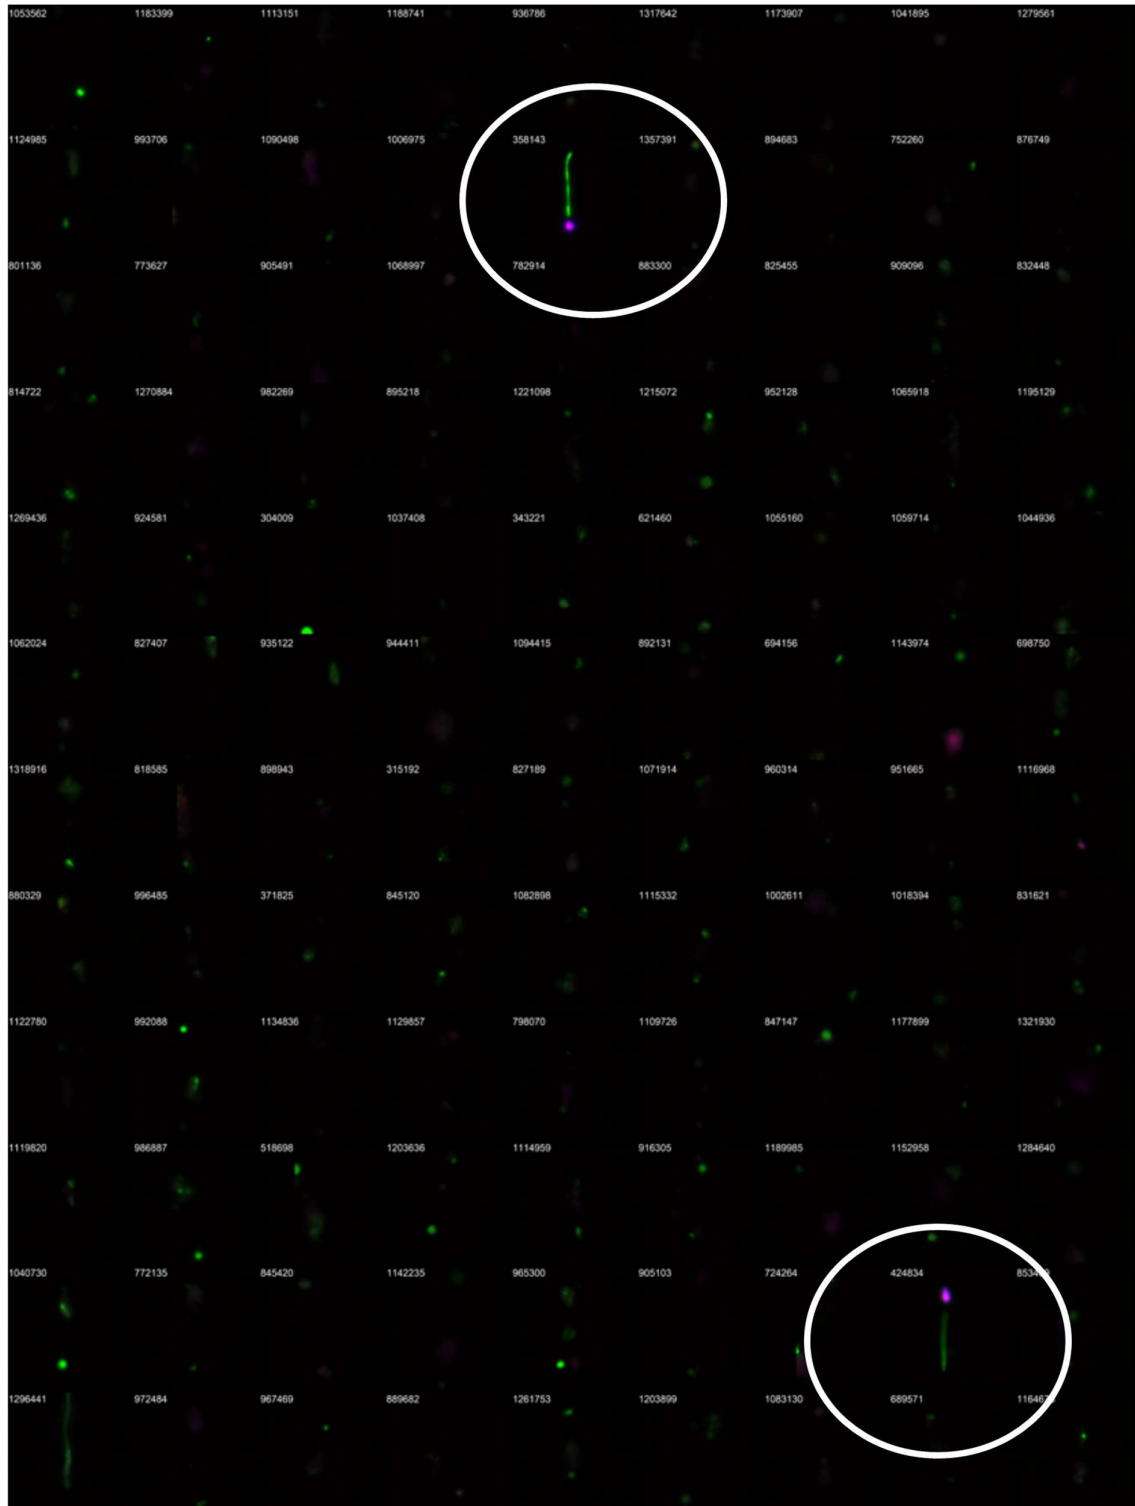

**Fig. S8. Visualization of two intact AKAP4<sup>+</sup>/ASPX<sup>+</sup>/Hoechst<sup>+</sup> spermatozoa in NOA semen pellet.** The figure includes 108 ImageStream images obtained for patient #88.
